# Supplementary material for: Factors Impacting the Reduction in Neophobia Prevalence in Phenylketonuria Patients
Source: MDPI journal article supplement (doi:10.3390/nu16060768), 2024-03-07
Supplement: s1 [file s1]

|     |                                                                                    |
|-----|------------------------------------------------------------------------------------|
| Q1  | The child has the curiosity to try new foods                                       |
| Q2  | The child does not trust newly introduced foods                                    |
| Q3  | If he doesn't know the ingredients that are in the food, the child doesn't try it  |
| Q4  | The child likes to try food specific to other countries                            |
| Q5  | Foods with unknown specific look weird to be eaten                                 |
| Q6  | The child tries new foods when at parties                                          |
| Q7  | The child is afraid to try new foods, unconsumed before                            |
| Q8  | The child is very clear when it comes to the foods he wants to eat                 |
| Q9  | The child eats anything                                                            |
| Q10 | The child would like to try new dishes from restaurants with different specialties |
